# Supplementary material for: Exploring the isopycnal mixing and helium–heat paradoxes in a suite of Earth system models
Source: Copernicus journal article supplement (doi:10.5194/os-11-591-2015), 2015-07-27
Supplement: Supplementary file 1 [file os-11-591-2015-supplement.zip]

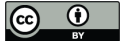

## *Supplement of*

# **Exploring the isopycnal mixing and helium–heat paradoxes in a suite of Earth system models**

**A. Gnanadesikan et al.**

*Correspondence to:* A. Gnanadesikan (gnanades@jhu.edu)

- [os-11-591-2015-supplement-title-page.pdf](#)
- [1200\\_helium\\_diags.nc](#)
- [2400\\_helium\\_diags.nc](#)
- [2d\\_helium\\_diags.nc](#)
- [400\\_helium\\_diags.nc](#)
- [800\\_helium\\_diags.nc](#)
- [ocean\\_neutral.res.aredi2d.nc](#)
- [ocean\\_neutral.res.aredi\\_zonav\\_2.nc](#)

The copyright of individual parts of the supplement might differ from the CC-BY 3.0 licence.
